# Supplementary material for: Antimicrobial Bacillus: Metabolites and Their Mode of Action
Source: MDPI journal article supplement (doi:10.3390/antibiotics11010088), 2022-01-12
Supplement: s1 [file s1]

## 223Antimicrobial *Bacillus*: metabolites and their mode of action

charlie tran, Ian E. Cock, Xiaojing Chen and Yunjinag Feng

**Table S1.** 47 antimicrobial metabolites from *Bacillus*.

| Metabolite   | Source strain                           | Molecular target  | Indicator strain                                                                                                                                | Bioactivity (MIC or otherwise indicated)                                                               | Source location                                                                                 | Reference |
|--------------|-----------------------------------------|-------------------|-------------------------------------------------------------------------------------------------------------------------------------------------|--------------------------------------------------------------------------------------------------------|-------------------------------------------------------------------------------------------------|-----------|
| Bacitracin A | N/A                                     | Cell wall/Biofilm | Staphylococcus mutans MTCC 497                                                                                                                  | 78.12 µg/ml                                                                                            | N/A                                                                                             | [16]      |
|              | B. GU057                                | Cell wall/Biofilm | Staphylococcus aureus<br>Micrococcus luteus                                                                                                     | ZoI = 18mm<br>ZoI = 13mm                                                                               | Saline soil in the roots of Terminalia Arjuna roots in District D.I.Khan at pH 8.2.             | [137]     |
|              | B. licheniformis DW2                    | Cell wall/Biofilm | N/A                                                                                                                                             | N/A                                                                                                    | N/A                                                                                             | [138]     |
|              | B. licheniformis 10716                  | Cell wall/Biofilm | N/A                                                                                                                                             | N/A                                                                                                    | N/A                                                                                             | [139]     |
|              | B. licheniformis strain AL              | Cell wall/Biofilm | N/A                                                                                                                                             | N/A                                                                                                    | N/A                                                                                             | [139]     |
|              | B. licheniformis 16                     | Cell wall/Biofilm | N/A                                                                                                                                             | N/A                                                                                                    | N/A                                                                                             | [140]     |
|              | B. licheniformis 28 KA                  | Cell wall/Biofilm | Bacillus licheniformis                                                                                                                          | N/A                                                                                                    | N/A                                                                                             | [141]     |
|              | B. subtilis C 126                       | Cell wall/Biofilm | Micrococcus flavus N/A                                                                                                                          | N/A                                                                                                    | Sugar Cane                                                                                      | [142]     |
|              | B. licheniformis A-5                    | Cell wall/Biofilm | N/A                                                                                                                                             | N/A                                                                                                    | Chinese liquor-making process                                                                   | [142]     |
|              | B. subtilis MH-4                        | Cell wall/Biofilm | N/A                                                                                                                                             | N/A                                                                                                    | N/A                                                                                             | [143]     |
|              | B. spp. GU215                           | Cell wall/Biofilm | Staphylococcus aureus                                                                                                                           | ZoI = 18mm                                                                                             | N/A                                                                                             | [144]     |
|              | B. paralicheniformis UBBLi30            | Cell wall/Biofilm | Micrococcus luteus<br>MRSA<br>Streptococcus aureus<br>Streptococcus Pyrogenes<br>Propionibacterium Acnes<br>Micrococcus luteus MTCC 106<br>MRSA | ZoI = 30.6mm<br>ZoI = 9.6mm<br>ZoI = 10.6mm<br>ZoI = 10.3mm<br>ZoI = 11.0mm<br>0.015625 mg/l<br>8 mg/l | Traditional fermented food and preserved in culture collection of Unique Biotech Limited, India | [32]      |
| Bacilysin    |                                         |                   | E. coli                                                                                                                                         | 0.001 µg/ml                                                                                            |                                                                                                 | [21]      |
|              | B. amyloliquefaciens X030/ (KM191359.1) | Cell wall         | N/A                                                                                                                                             | N/A                                                                                                    | Peanut soil in Henan province                                                                   | [145]     |
|              | B. subtilis A14                         | Cell wall         | N/A                                                                                                                                             | N/A                                                                                                    | N/A                                                                                             | [146]     |
|              | B. subtilis 168                         | Cell wall         | N/A                                                                                                                                             | N/A                                                                                                    | N/A                                                                                             | [147]     |
|              | B. subtilis ME488                       | Cell wall         | N/A                                                                                                                                             | N/A                                                                                                    | Korean greenhouse soils                                                                         | [148]     |
|              | B. sp. strain CS93                      | Cell wall         | N/A                                                                                                                                             | N/A                                                                                                    | Pozol, Villahermosa, Tabasco, Mexico                                                            | [149]     |
|              | B. amyloliquefaciens ZJU-2011           | Cell wall         | N/A                                                                                                                                             | N/A                                                                                                    | East China Sea                                                                                  | [20]      |
|              | B. amyloliquefaciens MTCC 10456         | Cell wall         | Malassezia furfur ATCC 44344,<br>Malassezia furfur ATCC 12078,<br>Malassezia globose ATCC MYA 4612                                              | 50-100 µg/mL<br>50-110 µg/mL<br>30-100 µg/mL                                                           | Seaweed                                                                                         | [150]     |
|              | B. luciferensis K2                      | Cell wall         | N/A                                                                                                                                             | N/A                                                                                                    | Organic soils of Sikkim, India                                                                  | [151]     |
|              | B. amyloliquefaciens K12                | Cell wall         | N/A                                                                                                                                             | N/A                                                                                                    | Organic soils of Sikkim, India                                                                  | [151]     |
|              | B. subtilis BioCWB                      | Cell wall         | N/A                                                                                                                                             | N/A                                                                                                    | Organic soils of Sikkim, India                                                                  | [151]     |

[illegible]

|              |                                                      |                          |                                                                                                                                                                                                                                                                                                                                                                                                                                                                                                                                                                                                                                                                                                                                                                                                   |                                                                                                                                                                                                                                                        |                                                                                     |       |
|--------------|------------------------------------------------------|--------------------------|---------------------------------------------------------------------------------------------------------------------------------------------------------------------------------------------------------------------------------------------------------------------------------------------------------------------------------------------------------------------------------------------------------------------------------------------------------------------------------------------------------------------------------------------------------------------------------------------------------------------------------------------------------------------------------------------------------------------------------------------------------------------------------------------------|--------------------------------------------------------------------------------------------------------------------------------------------------------------------------------------------------------------------------------------------------------|-------------------------------------------------------------------------------------|-------|
|              | B. clausii UBBC07 (MTC 5472)                         | Cell wall                | Micrococcus luteus<br>Listeria monocytogenes<br>Enterococcus faecium<br>Enterococcus faecalis<br>Clostridioides difficile<br>Staphylococcus aureus<br>MRSA                                                                                                                                                                                                                                                                                                                                                                                                                                                                                                                                                                                                                                        | 20.5 mg/L<br>16.9 mg/L<br>11.9 mg/L<br>10.8 mg/L<br>12.7 mg/L<br>15.3 mg/L<br>13.7 mg/L                                                                                                                                                                | N/A                                                                                 | [153] |
|              |                                                      | Cell wall                | Micrococcus luteus<br>MRSA                                                                                                                                                                                                                                                                                                                                                                                                                                                                                                                                                                                                                                                                                                                                                                        | 16 mg/L<br>128 mg/L                                                                                                                                                                                                                                    |                                                                                     | [153] |
| Mersacidin   | N/A                                                  | Cell wall                | Staphylococcus aureus SG511<br>Staphylococcus aureus SA137/93A<br>Staphylococcus aureus SA137/93G                                                                                                                                                                                                                                                                                                                                                                                                                                                                                                                                                                                                                                                                                                 | 1 µg/ml<br>35 µg/ml<br>30 µg/ml                                                                                                                                                                                                                        |                                                                                     | [34]  |
|              | B. HIL Y-85,54728                                    | Cell wall                | Micrococcus luteus ATCC 4698 Staphylococcus simulans 22                                                                                                                                                                                                                                                                                                                                                                                                                                                                                                                                                                                                                                                                                                                                           | 0.1 µg/ml<br>11 µg/ml                                                                                                                                                                                                                                  | Mulund (salt pan), Maharashtra, India                                               | [154] |
|              | N/A                                                  | Cell wall                | Staphylococcus aureus SH1000<br>Staphylococcus aureus R33 MRSA<br>Staphylococcus epidermidis NCTC11047<br>Streptococcus pneumoniae BAA-255<br>Micrococcus luteus ATCC 4698<br>Enterococcus faecium ATCC 19579<br>Enterococcus faecalis ATCC 29212<br>Enterococcus faecium 7131121 VRE                                                                                                                                                                                                                                                                                                                                                                                                                                                                                                             | 32 µg/ml<br>32 µg/ml<br>16, 32 µg/ml<br>2 µg/ml<br>1, 2 µg/ml<br>32 µg/ml<br>64 µg/ml<br>64 µg/ml                                                                                                                                                      |                                                                                     | [155] |
|              | Bacillus amyloliquefaciens subsp. plantarum B9601-Y2 | Cell wall                | N/A                                                                                                                                                                                                                                                                                                                                                                                                                                                                                                                                                                                                                                                                                                                                                                                               | N/A                                                                                                                                                                                                                                                    | wheat rhizosphere                                                                   | [156] |
| Amylolysin A | B. amyloliquefaciens GA1                             | Cell wall/ Cell membrane | Micrococcus luteus ATCC 9341<br>Staphylococcus epidermis ATCC 1228<br>Staphylococcus aureus ATCC 25923<br>Staphylococcus aureus ATCC 43300<br>Staphylococcus aureus RFB127<br>Enterococcus faecalis ATCC 29212<br>Enterococcus faecalis RFB129<br>Enterococcus faecium RFB128<br>Listeria monocytogenes LMG 23905<br>Listeria monocytogenes LMG 21263<br>Listeria monocytogenes LM2234<br>Listeria innocua ATCC33090<br>Listeria innocua RFB159<br>Listeria ivanovii RFB160<br>Bacillus cereus RFB125<br>Bacillus subtilis ATCC 6633<br>Bacillus megaterium RFB124<br>Streptococcus agalactiae RFB141<br>Weissella sp RFB139<br>Lactobacillus plantarum RFB138<br>Escherichia coli RFB149<br>Pseudomonas aeruginosa RFB148<br>Cryptococcus neoformans IHEM3969<br>Saccharomyces cerevisiae RFY100 | 0.7 µM<br>2.8 µM<br>2.8 µM<br>0.4 µM<br>1.4 µM<br>1.4 µM<br>0.7 µM<br>0.1 µM<br>0.4 µM<br>0.5 µM<br>0.4 µM<br>0.7 µM<br>0.7 µM<br>0.8 µM<br>0.2 µM<br>1.4 µM<br>0.4 µM<br>2.8 µM<br>2.8 µM<br>> 2.8 µM<br>> 2.8 µM<br>> 2.8 µM<br>> 2.8 µM<br>> 2.8 µM | Strawberry                                                                          | [37]  |
|              | B. subtilis S499                                     | Cell wall/ Cell membrane | N/A                                                                                                                                                                                                                                                                                                                                                                                                                                                                                                                                                                                                                                                                                                                                                                                               | N/A                                                                                                                                                                                                                                                    | Cultivated soil in the Iturie region (Democratic Republic of Congo; Delcambe, 1965) | [157] |

|                           |                          |                          |                                                                                                                                                                                                                                                                                                                                                                          |                                                                                                                         |                         |       |
|---------------------------|--------------------------|--------------------------|--------------------------------------------------------------------------------------------------------------------------------------------------------------------------------------------------------------------------------------------------------------------------------------------------------------------------------------------------------------------------|-------------------------------------------------------------------------------------------------------------------------|-------------------------|-------|
| Haloduracin               | B. halodurans C-125      | Cell wall/ Cell membrane | Lactococcus lactis HP<br>Lactococcus lactis 481<br>Lactococcus lactis 11454<br>Vancomycin resistant Enterococcus faecium<br>Bacillus anthracis Sterne 7702<br>Bacillus subtilis<br>Methicillin-resistant Staphylococcus aureus<br>Staphylococcus aureus<br>Staphylococcus epidermidis 15X<br>Micrococcus luteus<br>Streptococcus mutans                                  | 73.4 nM<br>195 nM<br>625 nM<br>781 nM<br><br>677 nM<br>469 nM<br>4690 nM<br><br>1560 nM<br>313 nM<br>1250 nM<br>2500 nM | N/A                     | [38]  |
| $\epsilon$ -poly-L-Lysine | B. subtilis SDNS         | Cell membrane            | Escherichia coli<br>Staphylococcus aureus<br>Enterococcus faecalis<br>Pseudomonas aeruginosa<br>Vibrio sp. N2,<br>Vibrio fluvialis<br>Vibrio bulifucus                                                                                                                                                                                                                   | Active<br>Active<br>Active<br>Active<br>Active<br>Active<br>Active                                                      | Sea water in Alexandria | [43]  |
|                           | N/A                      | N/A                      | Gardnerella vaginalis                                                                                                                                                                                                                                                                                                                                                    | 33 $\mu\text{g/mL}$                                                                                                     |                         | [97]  |
| Plantazolicin             | B. velezensis FZB42      | Cell membrane            | Bacillus brevis ATCC 8246<br>Bacillus subtilis 168<br>Bacillus cereus ATCC 14579<br>Bacillus licheniformis ATCC 9789<br>Micrococcus luteus<br>Bacillus subtilis CU1065<br>Bacillus subtilis HB0042<br>Bacillus sphaericus<br>Paenibacillus granivorans<br>Bacillus megaterium 7A1                                                                                        | Active<br>Active<br>Active<br>Active<br>Active<br>Active<br>Active<br>Active<br>Active<br>Active                        | N/A                     | [158] |
|                           |                          | Cell membrane            | Bacillus anthracis Sterne 7702<br>Bacillus anthracis Sterne 34F2 A0517.1<br>Bacillus cereus 2002013145<br>Bacillus cereus 2002013146<br>Bacillus cereus 2002013100<br>Bacillus cereus 2002013102<br>Bacillus cereus ATCC 4342<br>Bacillus cereus ATCC 7064<br>Bacillus cereus CDC 32805<br>Bacillus cereus G9241<br>Bacillus megaterium 899<br>Bacillus mycoides 96/3308 | 1<br>2<br>>64<br>>64<br>>64<br>>64<br>>64<br>>64<br>>64<br>8<br>32<br>>64                                               | N/A                     | [45]  |
|                           | B. velezensis LM2303     | Cell membrane            | N/A                                                                                                                                                                                                                                                                                                                                                                      | N/A                                                                                                                     | N/A                     | [159] |
| Octapeptin B (EM-49)      | B. circulans ATCC 21,656 | Cell membrane            | Escherichia coli SC 9251<br>Escherichia coli SC 9252<br>Escherichia coli SC 9253<br>Bacillus subtilis GSY 201                                                                                                                                                                                                                                                            | 1.6 $\mu\text{g/mL}$<br>0.8 $\mu\text{g/mL}$<br>0.3 $\mu\text{g/mL}$<br>0.2 $\mu\text{g/mL}$                            | N/A                     | [160] |
| Aurantinin B              | B. subtilis fmb60        | Cell membrane            | Staphylococcus aureus ATCC 25923<br>Micrococcus luteus CMCC 28001                                                                                                                                                                                                                                                                                                        | 1.56 $\mu\text{g/mL}$<br>3.12 $\mu\text{g/mL}$                                                                          | Compost                 | [48]  |

|              |                            |                               |                                                                                                                                                                                                                                                                                                                                                                               |                                                                                                                                                        |         |       |
|--------------|----------------------------|-------------------------------|-------------------------------------------------------------------------------------------------------------------------------------------------------------------------------------------------------------------------------------------------------------------------------------------------------------------------------------------------------------------------------|--------------------------------------------------------------------------------------------------------------------------------------------------------|---------|-------|
|              |                            |                               | Bacillus pumilus CMCC 63202<br>Bacillus cereus ATCC 14579<br>Bacillus subtilis ATCC 168<br>Listeria monocytogenes CICC 21662<br>Enterococcus faecalis ATCC 29212<br>Pseudomonas fluorescens ATCC 49642<br>Clostridium sporogenes CICC 10385<br>Staphylococcus aureus MRSA<br>Escherichia coli ATCC 25922                                                                      | 0.78 µg/mL<br>0.78 µg/mL<br>1.56 µg/mL<br>1.56 µg/mL<br>1.56 µg/mL<br>1.56 µg/mL<br>0.78 µg/mL<br>6.25 µg/mL<br>>100 µg/mL                             |         |       |
| Aurantinin C | B. subtilis fmb60          | Cell membrane                 | Staphylococcus aureus ATCC 25923<br>Micrococcus luteus CMCC 28001<br>Bacillus pumilus CMCC 63202<br>Bacillus cereus ATCC 14579<br>Bacillus subtilis ATCC 168<br>Listeria monocytogenes CICC 21662<br>Enterococcus faecalis ATCC 29212<br>Pseudomonas fluorescens ATCC 49642<br>Clostridium sporogenes CICC 10385<br>Staphylococcus aureus MRSA<br>Escherichia coli ATCC 25922 | 1.56 µg/mL<br>3.12 µg/mL<br>0.78 µg/mL<br>0.78 µg/mL<br>1.56 µg/mL<br>1.56 µg/mL<br>1.56 µg/mL<br>1.56 µg/mL<br>0.78 µg/mL<br>6.25 µg/mL<br>>100 µg/mL | Compost | [48]  |
| Aurantinin D | B. subtilis fmb60          | Cell membrane                 | Staphylococcus aureus ATCC 25923<br>Micrococcus luteus CMCC 28001<br>Bacillus pumilus CMCC 63202<br>Bacillus cereus ATCC 14579<br>Bacillus subtilis ATCC 168<br>Listeria monocytogenes CICC 21662<br>Enterococcus faecalis ATCC 29212<br>Pseudomonas fluorescens ATCC 49642<br>Clostridium sporogenes CICC 10385<br>Staphylococcus aureus MRSA<br>Escherichia coli ATCC 25922 | 1.56 µg/mL<br>3.12 µg/mL<br>0.78 µg/mL<br>0.78 µg/mL<br>1.56 µg/mL<br>1.56 µg/mL<br>1.56 µg/mL<br>1.56 µg/mL<br>0.78 µg/mL<br>6.25 µg/mL<br>>100 µg/mL | Compost | [48]  |
| Myriocin     |                            |                               | C. albicans (ATCC 10231D-5)<br>C. glabrata (ATCC 10231D-5)<br>C. glabrata (109)<br>C. albicans (1114)<br>C. albicans (12-99)                                                                                                                                                                                                                                                  | 2.0 µg/mL<br>1.0 µg/mL<br>0.5 µg/mL<br>1.0 µg/mL<br>0.25 µg/mL                                                                                         |         | [49]  |
|              | B. amyloliquefaciens LZN01 | Cell membrane /Intra-cellular | N/A                                                                                                                                                                                                                                                                                                                                                                           | N/A                                                                                                                                                    |         | [161] |
| Gramicidin A | B. brevis ATCC 8185        | Cell membrane, DNA            | Streptococcus pyogenes<br>Enterococcus faecalis<br>Streptococcus pneumoniae<br>Streptococcus agalactiae<br>Listeria monocytogenes                                                                                                                                                                                                                                             | 33 nM<br>270 nM<br>8.3 nM<br>1100 nM<br>4300 nM                                                                                                        |         | [52]  |
| Gramicidin S | N/A                        | Cell membrane                 | Enterococcus faecium 3.9µM<br>Streptococcus aureus 3.9-7.8 µM<br>Klebsiella pneumoniae 31.3 – 62.5 µM<br>Acinetobacter baumannii 15.6-62.5µM<br>Pseudomonas aeruginosa 31.3-62.5µM<br>Enterobacter cloacae 1.95 0 62.5µM                                                                                                                                                      | 3.9 µM<br>3.9 – 7.8 µM<br>31.3 – 62.5 µM<br>15.6 – 62.5 µM<br>31.3 – 62.5 µM<br>1.98 – 62.5 µM                                                         |         | [55]  |
|              | B. brevis ATCC 9999        | Cell membrane                 | N/A                                                                                                                                                                                                                                                                                                                                                                           | N/A                                                                                                                                                    |         | [162] |

|             |                                                   |                                             |                                                                                                                                                                                                                                            |                                                                           |                                                                                                 |       |
|-------------|---------------------------------------------------|---------------------------------------------|--------------------------------------------------------------------------------------------------------------------------------------------------------------------------------------------------------------------------------------------|---------------------------------------------------------------------------|-------------------------------------------------------------------------------------------------|-------|
|             | <i>B. brevis</i> var. G.B.                        | Cell membrane                               | N/A                                                                                                                                                                                                                                        | N/A                                                                       |                                                                                                 | [163] |
| Surfactin A | <i>B. velezensis</i> LM2303                       | Cell membrane                               | N/A                                                                                                                                                                                                                                        | N/A                                                                       | dung of wild yak inhabited Qinghai-Tibet plateau, China                                         | [159] |
|             | <i>Bacillus subtilis</i> PB2-L1                   | Cell membrane                               | <i>Bacillus cereus</i> AS1.1846<br><i>Staphylococcus aureus</i> AS1.2465<br><i>Micrococcus luteus</i> CMCC28000<br><i>Pseudomonas fluorescens</i> AS1.1802<br><i>Salmonella enteritidis</i> CICC21527<br><i>Bacillus subtilis</i> ATCC9943 | 100 µg/mL<br>50 µg/mL<br>200 µg/mL<br>400 µg/mL<br>200 µg/mL<br>100 µg/mL |                                                                                                 | [164] |
|             | <i>B. subtilis</i> CMB32                          | Cell membrane                               | <i>Colletotrichum gloeosporioides</i>                                                                                                                                                                                                      |                                                                           | Soil                                                                                            | [165] |
|             | <i>B. amyloliquefaciens</i> strain FJAT-2349      | Cell membrane                               | N/A                                                                                                                                                                                                                                        | N/A                                                                       | Soil sample from JiuHuaMountain, Anhui Province, China                                          | [166] |
|             | <i>B. sp</i> P5                                   | Cell membrane                               | N/A                                                                                                                                                                                                                                        | N/A                                                                       | Puba, a regional fermentation product from cassava                                              | [167] |
|             | <i>B. velezensis</i> LHSB1                        | Cell membrane                               | N/A                                                                                                                                                                                                                                        | N/A                                                                       | Peanut seeds                                                                                    | [168] |
|             | <i>B. velezensis</i> BvL03                        | Cell membrane                               | N/A                                                                                                                                                                                                                                        | N/A                                                                       |                                                                                                 | [169] |
|             | <i>B. pumilus</i> ICVB403                         | Cell membrane                               | N/A                                                                                                                                                                                                                                        | N/A                                                                       | Copepod eggs                                                                                    | [170] |
|             | <i>Bacillus</i> NH-100                            | Cell membrane                               | <i>Fusarium moiliforme</i><br><i>Fusarium oxysporum</i><br><i>Fusarium solani</i> P302<br><i>Fusarium solani</i> ofio601 As5<br><i>Fusarium Solani</i> SAN1077<br><i>Trichoderma atroviride</i> P150907                                    | Active<br>Active<br>Active<br>Active<br>Active<br>Active                  | Applied Microbiology and Biotechnology (AMB) Lab, CIIT, Islamabad                               | [171] |
|             | <i>Bacillus</i> NH-217                            | Cell membrane                               | <i>Fusarium moiliforme</i><br><i>Fusarium oxysporum</i><br><i>Fusarium solani</i> P302<br><i>Fusarium solani</i> ofio601 As5<br><i>Fusarium Solani</i> SAN1077<br><i>Trichoderma atroviride</i> P150907                                    | Active<br>Active<br>Active<br>Active<br>Active<br>Active                  |                                                                                                 | [171] |
|             | <i>B. subtilis</i> S1702                          | Cell membrane                               | N/A                                                                                                                                                                                                                                        | N/A                                                                       |                                                                                                 | [172] |
| Surfactin B | <i>B. amyloliquefaciens</i> HR62                  | Cell membrane                               | N/A                                                                                                                                                                                                                                        | N/A                                                                       |                                                                                                 | [173] |
|             | <i>B. subtilis</i> S1702                          | Cell membrane                               | N/A                                                                                                                                                                                                                                        | N/A                                                                       |                                                                                                 | [172] |
| Surfactin C | <i>Bacillus atrophaeus</i> 176s                   | Cell membrane                               | N/A                                                                                                                                                                                                                                        | N/A                                                                       | <i>Tortella tortuosa</i> (Pottiaceae, Bryophyta) grown in an Austrian pine forest on limestone. | [174] |
| Lichenysin  | <i>B. megaterium</i> pL6 (Project Report SC 3488) | Cell membrane                               | N/A                                                                                                                                                                                                                                        | N/A                                                                       | Soil, Universidade de São Paulo, São Paulo, SP, Brazil                                          | [175] |
| Fengycin A  | <i>Bacillus amyloliquefaciens</i> Q-426           | Cell membrane /Cell wall, Intracellular, QS | <i>Fusarium oxysporum</i> f. sp. spinaciae O-27                                                                                                                                                                                            | 31.25 µg/ml                                                               | Isolated from compost samples collected in the Dalianregion of China                            | [176] |
|             | <i>B. velezensis</i> LHSB1                        | Cell membrane /Cell wall, Intracellular, QS | N/A                                                                                                                                                                                                                                        | N/A                                                                       |                                                                                                 | [168] |
|             | <i>B. subtilis</i> HC8                            | Cell membrane /Cell wall, Intracellular, QS | N/A                                                                                                                                                                                                                                        | N/A                                                                       |                                                                                                 | [177] |
|             | <i>B. subtilis</i> strain F-29-3                  | Cell membrane /Cell wall, Intracellular, QS | N/A                                                                                                                                                                                                                                        | N/A                                                                       | Isolated from potato farm                                                                       | [178] |
|             | <i>B. megaterium</i> pL6 (Project Report SC 3488) | Cell membrane /Cell wall, Intracellular, QS | N/A                                                                                                                                                                                                                                        | N/A                                                                       | Soil, Universidade de São Paulo, São Paulo, SP, Brazil                                          | [175] |
|             | <i>B. amyloliquefaciens</i> strain 32a            | Cell membrane /Cell wall, Intracellular, QS | N/A                                                                                                                                                                                                                                        | N/A                                                                       |                                                                                                 | [179] |



|            |                                           |                                                 |                                                                                                                                                                                                                                                                                                                                                                                                                                                             |                                                                                                      |                                                                                                          |       |
|------------|-------------------------------------------|-------------------------------------------------|-------------------------------------------------------------------------------------------------------------------------------------------------------------------------------------------------------------------------------------------------------------------------------------------------------------------------------------------------------------------------------------------------------------------------------------------------------------|------------------------------------------------------------------------------------------------------|----------------------------------------------------------------------------------------------------------|-------|
| Fengycin C | B. subtilis XF-1 (CGMCC No. 2357)         | Cell membrane /Cell wall, Intracellular, QS     | N/A                                                                                                                                                                                                                                                                                                                                                                                                                                                         | N/A                                                                                                  | rhizosphere soil of Chinese cabbage (Brassica pekinensis)                                                | [181] |
|            | B. subtilis EA-CB0015                     | Cell membrane /Cell wall, Intracellular, QS     | N/A                                                                                                                                                                                                                                                                                                                                                                                                                                                         | N/A                                                                                                  | phyllosphere of a banana plant                                                                           | [187] |
|            | B. subtilis S1702                         | Cell membrane /Cell wall, Intracellular, QS     | N/A                                                                                                                                                                                                                                                                                                                                                                                                                                                         | N/A                                                                                                  |                                                                                                          | [172] |
| Fengycin D | B. subtilis XF-1 (CGMCC No. 2357)         | Cell membrane /Cell wall, Intracellular, QS     | N/A                                                                                                                                                                                                                                                                                                                                                                                                                                                         | N/A                                                                                                  | rhizosphere soil of Chinese cabbage (Brassica pekinensis)                                                | [181] |
|            | B. subtilis S1702                         | Cell membrane /Cell wall, Intracellular, QS     | N/A                                                                                                                                                                                                                                                                                                                                                                                                                                                         | N/A                                                                                                  |                                                                                                          | [172] |
| Iturin A   | B. velezensis LM2303                      | Cell membrane, Intracellular cellular processes | N/A                                                                                                                                                                                                                                                                                                                                                                                                                                                         | N/A                                                                                                  | dung of wild yak inhabited Qinghai-Tibet plateau, China                                                  | [159] |
|            | B. megaterium pL6 (Project Report SC 3488 | Cell membrane, Intracellular cellular processes | N/A                                                                                                                                                                                                                                                                                                                                                                                                                                                         | N/A                                                                                                  | Soil, Universidade de São Paulo, São Paulo, SP, Brazil                                                   | [175] |
|            | B. subtilis B-3                           | Cell membrane, Intracellular cellular processes | Aspergillus clavatus SRRC 17<br>Aspergillus flavus SRRC 295 (nonaflatoxigenic)<br>Aspergillus flavus SRCC 2089 (aflatoxigenic)<br>Aspergillus orchaceus SRRC 335<br>Aspergillus parasiticus SRRC 1008<br>Aspergillus versicolor SRRC 108B<br>Fusarium moniliforme SRRC 1086<br>Fusarium nivale (Ferlacia) SRRC 131<br>Penicillium citrinum SRRC 1013<br>Penicillium expansum SRRC 1134<br>Penicillium italicum SRRC 1169<br>Penicillium virdicatum SRRC 217 | Active<br>Active<br><br>Active<br>Active<br>Active<br>Active<br>Active<br>Active<br>Active<br>Active | N/A                                                                                                      | [188] |
|            | B. velezensis BvL03                       | Cell membrane, Intracellular cellular processes | N/A                                                                                                                                                                                                                                                                                                                                                                                                                                                         | N/A                                                                                                  |                                                                                                          | [169] |
|            | B. amyloliquefaciens ANT1                 | Cell membrane, Intracellular cellular processes | N/A                                                                                                                                                                                                                                                                                                                                                                                                                                                         | N/A                                                                                                  | Isolated from a surgical room at the St. Mary of Lourdes Clinic (Naples district, Italy                  | [184] |
|            | B. licheniformis W10                      | Cell membrane, Intracellular cellular processes | N/A                                                                                                                                                                                                                                                                                                                                                                                                                                                         | N/A                                                                                                  | Isolated from a tomato rhizosphere                                                                       | [189] |
|            | B. subtilis strain KS03                   | Cell membrane, Intracellular cellular processes | Gloeosporium gloeosporioides                                                                                                                                                                                                                                                                                                                                                                                                                                | N/A                                                                                                  | rice straw                                                                                               | [190] |
|            | B. subtilis RB14-CS                       | Cell membrane, Intracellular cellular processes | Rhizoctonia solani,                                                                                                                                                                                                                                                                                                                                                                                                                                         | N/A                                                                                                  | N/A                                                                                                      | [191] |
|            | B. subtilis JA                            | Cell membrane, Intracellular cellular processes | Fusarium graminearum                                                                                                                                                                                                                                                                                                                                                                                                                                        | N/A                                                                                                  | Key Laboratory of Ion Beam Engineering, Chinese Academy of Sciences, Hefei 230031, Anhui province, China | [192] |

|  |                                           |                                                  |                                                                                                                                                                                                                                                                                                                                                                               |                                                                                                |                                                        |       |
|--|-------------------------------------------|--------------------------------------------------|-------------------------------------------------------------------------------------------------------------------------------------------------------------------------------------------------------------------------------------------------------------------------------------------------------------------------------------------------------------------------------|------------------------------------------------------------------------------------------------|--------------------------------------------------------|-------|
|  | B. subtilis HC8                           | Cell membrane, Intra-cellular cellular processes | N/A                                                                                                                                                                                                                                                                                                                                                                           | N/A                                                                                            | Giant hogweed, Heracleum sosnowskyi Manden             | [177] |
|  | B. sp. strain CS93                        | Cell membrane, Intra-cellular cellular processes | N/A                                                                                                                                                                                                                                                                                                                                                                           | N/A                                                                                            | Pozol, Villahermosa, Tabasco, Mexico                   | [152] |
|  | B. subtilis SSE4                          | Cell membrane, Intra-cellular cellular processes | N/A                                                                                                                                                                                                                                                                                                                                                                           | N/A                                                                                            | Shrimp shells                                          | [193] |
|  | B. megaterium pL6 (Project Report SC 3488 | Cell membrane, Intra-cellular cellular processes | N/A                                                                                                                                                                                                                                                                                                                                                                           | N/A                                                                                            | Soil, Universidade de São Paulo, São Paulo, SP, Brazil | [175] |
|  | B. amyloliquefaciens PPCB004              | Cell membrane, Intra-cellular cellular processes | Alternaria citri (Penz.) Mussat PPCF001<br>Botryosphaeria sp. PPAF001<br>Colletotrichum gloeosporioides (Penz.) Penz. & Sacc<br>Fusicoccum aromaticum (Sacc.) Petr. & Syd<br>Lasiodiploa theobromae (Pat.) Griffon & Maubi<br>Penicillium crustosum Thom<br>Phomopsis persea Zerova<br>Bacillus subtilis UMAF6614<br>Bacillus subtilis UMAF 6639<br>Bacillus subtilis PPCB001 | Active<br>Active<br>Active<br><br>Active<br><br>Active<br>Active<br>Active<br>Active<br>Active | Citrus fruit                                           | [194] |
|  | B. strain UMAF6639                        | Cell membrane, Intra-cellular cellular processes | Alternaria citri (Penz.) Mussat PPCF001<br>Botryosphaeria sp. PPAF001<br>Colletotrichum gloeosporioides (Penz.) Penz. & Sacc<br>Fusicoccum aromaticum (Sacc.) Petr. & Syd<br>Lasiodiploa theobromae (Pat.) Griffon & Maubi<br>Penicillium crustosum Thom<br>Phomopsis persea Zerova<br>Bacillus subtilis UMAF6614<br>Bacillus subtilis UMAF 6639<br>Bacillus subtilis PPCB001 | Active<br>Active<br>Active<br><br>Active<br><br>Active<br>Active<br>Active<br>Active<br>Active | N/A                                                    | [194] |
|  | B. subtilis CMB32                         | Cell membrane, Intra-cellular cellular processes | N/A                                                                                                                                                                                                                                                                                                                                                                           | N/A                                                                                            | Soil                                                   | [165] |
|  | B. subtilis 3-10                          | Cell membrane, Intra-cellular cellular processes | N/A                                                                                                                                                                                                                                                                                                                                                                           | N/A                                                                                            | Soil, Wuhan                                            | [195] |
|  | B. amyloliquefaciens S13-3                | Cell membrane, Intra-cellular cellular processes | N/A                                                                                                                                                                                                                                                                                                                                                                           | N/A                                                                                            | N/A                                                    | [196] |
|  | B. amyloliquefaciens S20                  | Cell membrane, Intra-cellular cellular processes | Fusarium oxysporum<br>Ralstonia solanacearum                                                                                                                                                                                                                                                                                                                                  | Active<br>Active                                                                               | rhizosphere soil from a healthy eggplant               | [197] |

|  |                                        |                                                 |                                                                                                                                                                                |                                                                              |                                                                                                                        |       |
|--|----------------------------------------|-------------------------------------------------|--------------------------------------------------------------------------------------------------------------------------------------------------------------------------------|------------------------------------------------------------------------------|------------------------------------------------------------------------------------------------------------------------|-------|
|  | <i>B. amyloliquefaciens</i> strain 32a | Cell membrane, Intracellular cellular processes | N/A                                                                                                                                                                            | N/A                                                                          | Tunisian soil sample                                                                                                   | [179] |
|  | <i>B. amyloliquefaciens</i> BAS23      | Cell membrane, Intracellular cellular processes | <i>Cochliobolus lunata</i><br><i>Fusarium semitectum</i><br><i>Heterodera oryzae</i>                                                                                           | Active<br>Active<br>Active                                                   | Soil bacteria were isolated from rice paddy fields in Nakhon Pathom province, Thailand                                 | [198] |
|  | <i>B. amyloliquefaciens</i> L-H15      | Cell membrane, Intracellular cellular processes | <i>Fusarium oxysporum</i><br><i>Phytophthora capsici</i><br><i>Rhizoctonia solani</i>                                                                                          | Active<br>Active<br>Active                                                   | Cucumber seedling substrate                                                                                            | [199] |
|  | <i>B. amyloliquefaciens</i> BUZ-14     | Cell membrane, Intracellular cellular processes | <i>Botrytis cinerea</i><br><i>Monilinia fructicola</i><br><i>Mandevilla laxa</i><br><i>Penicillium digitatum</i><br><i>Penicillium italicum</i><br><i>Penicillium expansum</i> | 16.9 µg/ml<br>8.5 µg/ml<br>4.1 µg/ml<br>16.9 µg/ml<br>8.5 µg/ml<br>8.5 µg/ml | surface of peach fruit from an orchard in Zaragoza                                                                     | [200] |
|  | <i>B. amyloliquefaciens</i> S76-3      | Cell membrane, Intracellular cellular processes | <i>Fusarium Graminearum</i>                                                                                                                                                    | 50 ug/ml                                                                     | spikes of wheat grown in our own experiment fields in our university, Wuhan, China                                     | [79]  |
|  | <i>B. subtilis</i> ZK0                 | Cell membrane, Intracellular cellular processes | N/A                                                                                                                                                                            | N/A                                                                          | Cotton                                                                                                                 | [201] |
|  | <i>B. subtilis</i> 3057                | Cell membrane, Intracellular cellular processes | N/A                                                                                                                                                                            | N/A                                                                          | N/A                                                                                                                    | [202] |
|  | <i>B. amyloliquefaciens</i> LZ-5       | Cell membrane, Intracellular cellular processes | <i>Saccharomyces cerevisiae</i>                                                                                                                                                | 0.76 mg/ml                                                                   | Chinese honey                                                                                                          | [203] |
|  | <i>B. subtilis</i> S1702               | Cell membrane, Intracellular cellular processes | N/A                                                                                                                                                                            | N/A                                                                          | healthy table grapes                                                                                                   | [172] |
|  | <i>B. pumilus</i> strain YSPMK11       | Cell membrane, Intracellular cellular processes | N/A                                                                                                                                                                            | N/A                                                                          | cauliflower plants were collected from four different naturally growing agro climatic zones of Himachal Pradesh.       | [204] |
|  | <i>B. subtilis</i> l'1a strain         | Cell membrane, Intracellular cellular processes | N/A                                                                                                                                                                            | N/A                                                                          | sludge of a 100-year-old oil refinery in Czechowice-Dziedzice (Po- land)                                               | [205] |
|  | <i>B. subtilis</i> NBRC 109107         | Cell membrane, Intracellular cellular processes | N/A                                                                                                                                                                            | N/A                                                                          | National Institute of Technology and Evaluation (NITE) of Japan                                                        | [206] |
|  | <i>B. siamensis</i> JFL15              | Cell membrane, Intracellular cellular processes | N/A                                                                                                                                                                            | N/A                                                                          | isolated from the gastrointestinal tract of hair-tail                                                                  | [207] |
|  | <i>B. subtilis</i> strain ET-1         | Cell membrane, Intracellular cellular processes | N/A                                                                                                                                                                            | N/A                                                                          | soil and both phenotypically and genetically identified at the microbiology laboratory of ENEA Research Centre Trisaia | [208] |
|  | <i>B. amyloliquefaciens</i> DA12       | Cell membrane, Intracellular cellular processes | <i>Fusarium graminearum</i> macroconidia                                                                                                                                       | Active                                                                       | soil in which tomatoes grew in a greenhouse in Buyeo-gun, Chungcheong                                                  | [209] |

|                |                                       |                                                              |                                                                                                                         |                                      |                                                                                                                |       |
|----------------|---------------------------------------|--------------------------------------------------------------|-------------------------------------------------------------------------------------------------------------------------|--------------------------------------|----------------------------------------------------------------------------------------------------------------|-------|
|                | B. amyloliquefaciens CX-20            | Cell membrane, Intracellular cellular processes              | N/A                                                                                                                     | N/A                                  | Professor Shouwen Chen (College of Life Sciences, Hubei University, Wuhan, China).                             | [210] |
|                | B. amyloliquefaciens Pc3              | Cell membrane, Intracellular cellular processes              | N/A                                                                                                                     | N/A                                  | Antarctic seawater                                                                                             | [183] |
|                | B. subtilis CCTCCM207209              | Cell membrane, Intracellular cellular processes              | N/A                                                                                                                     | N/A                                  | Strain previously isolated from soil and stored at the China Center for Type Culture Collection (Wuhan, China) | [183] |
|                | B. amyloliquefaciens Ba01             | Cell membrane, Intracellular cellular processes              | N/A                                                                                                                     | N/A                                  | isolated from healthy potato tuber                                                                             | [211] |
|                | B. amyloliquefaciens strain FJAT-2349 | Cell membrane, Intracellular cellular processes              | N/A                                                                                                                     | N/A                                  |                                                                                                                | [166] |
|                | B. amyloliquefaciens LL3              | Cell membrane, Intracellular cellular processes              | N/A                                                                                                                     | N/A                                  |                                                                                                                | [189] |
|                | B. subtilis ABS-S14                   | Cell membrane, Intracellular cellular processes              | N/A                                                                                                                     | N/A                                  | isolated from soil collected from citrus groves around the south of Thailand                                   | [212] |
| Bacillomycin D | Bacillus amyloliquefaciens Q-426      | Cell membrane, Intracellular processes, siderophore          | N/A                                                                                                                     | N/A                                  | Isolated from compost samples collected in the Dalianregion of China                                           | [176] |
|                | B. subtilis 3057                      | Cell membrane, Intracellular cellular processes, siderophore | N/A                                                                                                                     | N/A                                  | N/A                                                                                                            | [202] |
|                | B. amyloliquefaciens SQR9             | Cell membrane, Intracellular processes, siderophore          | N/A                                                                                                                     | N/A                                  | Cucumber rhizosphere                                                                                           | [213] |
|                | B. vallismortis ZZ185                 | Cell membrane, Intracellular processes, siderophore          | Fusarium graminearum<br>Alternaria alternata<br>Rhizoctonia solani<br>Cryphonectria parasitica<br>Phytophthora capsici. | Active<br>Active<br>Active<br>Active | Healthy stems of the plant Broadleaf Holly (Ilex latifolia Thunb) collected in Nanjing, China                  | [214] |
|                | B. amyloliquefaciens strain SD-32     | Cell membrane, Intracellular processes, siderophore          | Podosphaera fusca                                                                                                       | Active                               | Soil sample obtained in Japan                                                                                  | [109] |
|                | B. amyloliquefaciens BS6              | Cell membrane, Intracellular processes, siderophore          | N/A                                                                                                                     | N/A                                  | N/A                                                                                                            | [202] |
|                | B. mycoides 4079                      | Cell membrane, Intracellular processes, siderophore          | N/A                                                                                                                     | N/A                                  | N/A                                                                                                            | [202] |
|                | B. velezensis HN-2                    | Cell membrane, Intracellular processes, siderophore          | Colletotrichum gloeosporioides                                                                                          | EC50 = 3.462 ug/ml                   | Soil                                                                                                           | [82]  |
|                | B. velezensis FZB42                   | Cell membrane, Intracellular processes, siderophore          | Fusarium oxysporum                                                                                                      | Active                               |                                                                                                                | [215] |

|              |                                 |                                                     |                                                                                                                                                                                                                                                                                                                                                                                                                                                                                                                                      |                                                                                                                                                                                                                |                                                                                     |       |
|--------------|---------------------------------|-----------------------------------------------------|--------------------------------------------------------------------------------------------------------------------------------------------------------------------------------------------------------------------------------------------------------------------------------------------------------------------------------------------------------------------------------------------------------------------------------------------------------------------------------------------------------------------------------------|----------------------------------------------------------------------------------------------------------------------------------------------------------------------------------------------------------------|-------------------------------------------------------------------------------------|-------|
|              | B. sp. strain BCLRB2            | Cell membrane, Intracellular processes, siderophore | N/A                                                                                                                                                                                                                                                                                                                                                                                                                                                                                                                                  | N/A                                                                                                                                                                                                            | healthy leaves of olive tree                                                        | [216] |
|              | B. velezensis NST6              | Cell membrane, Intracellular processes, siderophore | Staphylococcus aureus<br>Staphylococcus epidermidis<br>MRSA 3090                                                                                                                                                                                                                                                                                                                                                                                                                                                                     | 2 µg/ml<br>2 µg/ml<br>2 µg/ml                                                                                                                                                                                  | soil sample                                                                         | [217] |
|              | B. amyloliquefaciens C5         | Cell membrane, Intracellular processes, siderophore | N/A                                                                                                                                                                                                                                                                                                                                                                                                                                                                                                                                  | N/A                                                                                                                                                                                                            | roots of olive tree                                                                 | [218] |
|              | B. velezensis BvL03             | Cell membrane, Intracellular processes, siderophore | N/A                                                                                                                                                                                                                                                                                                                                                                                                                                                                                                                                  | N/A                                                                                                                                                                                                            |                                                                                     | [169] |
|              | B. amyloliquefaciens MTCC 10456 | Cell membrane, Intracellular processes, siderophore | N/A                                                                                                                                                                                                                                                                                                                                                                                                                                                                                                                                  | N/A                                                                                                                                                                                                            | Seaweed                                                                             | [150] |
|              | B. sp. PPM3                     | Cell membrane, Intracellular processes, siderophore | N/A                                                                                                                                                                                                                                                                                                                                                                                                                                                                                                                                  | N/A                                                                                                                                                                                                            | Bacillus sp. PPM3 isolated from marine sediment from the Red Sea in Hurghada, Egypt | [219] |
| Mycosubtilin | B. subtilis 370                 | Cell membrane                                       | Mycoderma valida<br>Saccharomyces carlsbergensis, 9080<br>Rhodotorula rubra<br>Sporobolomyces roseus<br>Torula cremoris<br>Dipodascus uninucleolus<br>Hansenula anomala, 4104<br>Torulopsis delbruckii<br>Microsporum lanosum<br>Trichophyton mentagrophytes<br>Fusarium moniliforme<br>Nematospora coryli<br>Penicillium notatum<br>Chaetomium bostrychodes<br>Microsporum audouinii<br>Achorium schoenleinii<br>Cryptococcus neoformans<br>Epidermophyton inguinale<br>Sclerotinia fructicola<br>Ustilago zeae<br>Trichophyton sp. | Active<br>Active<br>Active<br>Active<br>Active<br>Active<br>Active<br>Active<br>Active<br>Active<br>Active<br>Active<br>Active<br>Active<br>Active<br>Active<br>Active<br>Active<br>Active<br>Active<br>Active |                                                                                     | [220] |
|              | B. sp. PPM3                     |                                                     | N/A                                                                                                                                                                                                                                                                                                                                                                                                                                                                                                                                  | N/A                                                                                                                                                                                                            |                                                                                     | [219] |
|              | Bacillus subtilis ATCC 6633     |                                                     | Saccharomyces cerevisiae<br>Yarrowia lipolytica CBS6303<br>Pichia pastoris<br>Candida albicans ATCC 10231<br>Candida albicans IHEM3742<br>Candida parapsilosis IHEM9557<br>Candida tropicalis IHEM6246<br>Candida guilliermondii IHEM 1067<br>Candida glabrata IHEM 6161<br>Candida glabrata L999                                                                                                                                                                                                                                    | 4 ug/ml<br>8 ug/ml<br>32 ug/ml<br>32 ug/ml<br>64 ug/ml<br>128 ug/ml<br>16 ug/ml<br>128 ug/ml<br>16 ug/ml<br>2 ug/ml                                                                                            |                                                                                     | [221] |

|                |                                 |                         |                                                                                                                                                                                                                                                                                                                                                                                                                                                                                                |                                                                                                                                |                               |          |
|----------------|---------------------------------|-------------------------|------------------------------------------------------------------------------------------------------------------------------------------------------------------------------------------------------------------------------------------------------------------------------------------------------------------------------------------------------------------------------------------------------------------------------------------------------------------------------------------------|--------------------------------------------------------------------------------------------------------------------------------|-------------------------------|----------|
|                |                                 |                         | Candida glabrata S53452<br>Candida glabrata H34736<br>Candida glabrata W16119<br>Cryptococcus neoformans IHEM 3969<br>Aspergillus parasiticus IHEM4384<br>Aspergillus terreus IHEM2499<br>Aspergillus fumigatus IHEM3562                                                                                                                                                                                                                                                                       | 150 ug/ml<br>150 ug/ml<br>150 ug/ml<br>8 ug/ml<br>>300 ug/ml<br>>300 ug/ml<br>>300 ug/ml                                       |                               |          |
| Bacillomycin L | B. amyloliquefaciens K103       | Cell membrane           | Rhizoctonia solani Kühn                                                                                                                                                                                                                                                                                                                                                                                                                                                                        | N/A                                                                                                                            | lemon                         | [87]     |
|                | B. subtilis NCIB 8872           | Cell membrane           | N/A                                                                                                                                                                                                                                                                                                                                                                                                                                                                                            | N/A                                                                                                                            |                               | [222]    |
|                | B. amyloliquefaciens SYBC H47   | Cell membrane           | Botryosphaeria dothidea                                                                                                                                                                                                                                                                                                                                                                                                                                                                        | N/A                                                                                                                            | Peach Gummosis                | [223]    |
| Mycobacillin   | B. subtilis B3                  | Cell membrane           | Aspergillus niger strain G3Br                                                                                                                                                                                                                                                                                                                                                                                                                                                                  | 20 mg/ml                                                                                                                       |                               | [94,224] |
| Subtilisin A   | B. subtilis ATCC 19659          | Cell membrane//Bio-film | N/A                                                                                                                                                                                                                                                                                                                                                                                                                                                                                            | N/A                                                                                                                            |                               | [225]    |
|                | B. subtilis EMD4                | Cell membrane//Bio-film | Bacillus cereus ATCC14579<br>Bacillus subtilis ATCC14593<br>Bacillus licheniformis ATCC21415<br>Bacillus thuringiensis ATCC33679<br>Enterococcus faecalis ATCC29212<br>Enterococcus faecium ATCC19953<br>Lactobacillus delbrueckii ssp. lactis ATCC4797<br>Lactobacillus casei ssp. casei ATCC4646<br>Lactobacillus pentosus ATCC8041<br>Leuconostoc mesenteroides ATCC9135<br>Listeria monocytogenes ATCC19111<br>Pediococcus pentosaceus NRRL B-14009<br>Streptococcus thermophilus KFRI 193 | Active<br>Active<br>Active<br>Active<br>Active<br>Active<br>Active<br>Active<br>Active<br>Active<br>Active<br>Active<br>Active | Soy Sauce                     | [226]    |
|                | B. amyloliquefaciens (EU105395) | Cell membrane//Bio-film | Micrococcus luteus ATCC 10420<br>Listeria monocytogenes Scott A<br>Gardnerella vaginalis ATCC 14018<br>Gardnerella vaginalis (clinical isolate)<br>Streptococcus agalactiae (clinical isolate)                                                                                                                                                                                                                                                                                                 | Active<br>Active<br>Active<br>Active<br>Active                                                                                 |                               | [227]    |
|                | B. amyloliquefaciens BAhja NK10 | Cell membrane//Bio-film | Micrococcus luteus A1 NCIMB 8166<br>Listeria monocytogenes WSLC 1018                                                                                                                                                                                                                                                                                                                                                                                                                           | 2.8mm<br>2.4mm                                                                                                                 | Soil                          | [228]    |
|                | B. tequilensis FR9              | Cell membrane//Bio-film | Listeria monocytogenes MTCC 657                                                                                                                                                                                                                                                                                                                                                                                                                                                                | Active                                                                                                                         | free-range chickens GUT       | [229]    |
|                | B. subtilis KATMIRA1933         | Cell membrane//Bio-film | Gardnerella vaginalis<br>Listeria monocytogenes<br>Escherichia coli                                                                                                                                                                                                                                                                                                                                                                                                                            | 6.25 µg/ml<br>125 µg/ml<br>250 µg/ml                                                                                           |                               | [99]     |
|                | B. subtilis BSD-2               | Cell membrane//Bio-film | N/A                                                                                                                                                                                                                                                                                                                                                                                                                                                                                            | N/A                                                                                                                            |                               | [230]    |
|                | N/A                             | Cell membrane//Bio-film | G. vaginalis                                                                                                                                                                                                                                                                                                                                                                                                                                                                                   | 7.2 µg/mL                                                                                                                      |                               | [97]     |
|                | B. subtilis strain SEM-2        | Cell membrane//Bio-film | N/A                                                                                                                                                                                                                                                                                                                                                                                                                                                                                            | N/A                                                                                                                            | silkworm excrement composting | [231]    |
| Zwittermicin A | B. thuringiensis HD-1           | Intracellular processes | Erwinia herbicola L S005<br>Escherichia coli K37                                                                                                                                                                                                                                                                                                                                                                                                                                               | 60 µg/ml<br>100 µg/ml                                                                                                          |                               | [100]    |

|                         |                                                |                         |                                                                                                                                                                                                                                                                                                                      |                                                                                                                                     |                                                         |       |
|-------------------------|------------------------------------------------|-------------------------|----------------------------------------------------------------------------------------------------------------------------------------------------------------------------------------------------------------------------------------------------------------------------------------------------------------------|-------------------------------------------------------------------------------------------------------------------------------------|---------------------------------------------------------|-------|
|                         |                                                |                         | Bacillus subtilis 168<br>Staphylococcus aureus 3001                                                                                                                                                                                                                                                                  | 120 µg/ml<br>200 µg/ml                                                                                                              |                                                         |       |
|                         | B. cereus UW85                                 | Intracellular processes | N/A                                                                                                                                                                                                                                                                                                                  | N/A                                                                                                                                 | Root of a field-grown alfalfa plant from Arlington, WI  | [23]  |
|                         | B. amyloliquefaciens BS6                       | Intracellular processes | N/A                                                                                                                                                                                                                                                                                                                  | N/A                                                                                                                                 |                                                         | [202] |
|                         | B. mycoides S                                  | Intracellular processes | N/A                                                                                                                                                                                                                                                                                                                  | N/A                                                                                                                                 |                                                         | [202] |
|                         | B. thuringiensis BS8                           | Intracellular processes | N/A                                                                                                                                                                                                                                                                                                                  | N/A                                                                                                                                 |                                                         | [202] |
| Difficidin              | B. subtilis ATCC 39320                         | Intracellular processes | Escherichia coli MB 4827                                                                                                                                                                                                                                                                                             | 35 µg/ml                                                                                                                            |                                                         | [103] |
|                         | B. velezensis LM2303                           | Intracellular processes | N/A                                                                                                                                                                                                                                                                                                                  | N/A                                                                                                                                 | dung of wild yak inhabited Qinghai-Tibet plateau, China | [159] |
|                         | B. velezensis LDO2                             | Intracellular processes | N/A                                                                                                                                                                                                                                                                                                                  | N/A                                                                                                                                 | peanut                                                  | [232] |
|                         | B. velezensis FZB42                            | Intracellular processes | N/A                                                                                                                                                                                                                                                                                                                  | N/A                                                                                                                                 |                                                         | [158] |
|                         | B. velezensis V4                               | Intracellular processes | N/A                                                                                                                                                                                                                                                                                                                  | N/A                                                                                                                                 |                                                         | [233] |
|                         | B. amyloliquefaciens subsp. plantarum B9601-Y2 | Intracellular processes | N/A                                                                                                                                                                                                                                                                                                                  | N/A                                                                                                                                 |                                                         | [156] |
|                         | B. subtilis S499                               | Intracellular processes | N/A                                                                                                                                                                                                                                                                                                                  | N/A                                                                                                                                 |                                                         | [157] |
| Sublancin (Lantibiotic) | B. subtilis 168                                | Intracellular processes | MRSA                                                                                                                                                                                                                                                                                                                 | 15 µM                                                                                                                               |                                                         | [105] |
|                         | Bacillus subtilis A52                          | Intracellular processes | Staphylococcus aureus MTCC 1433<br>Bacillus subtilis MTCC 121<br>Bacillus cereus MTCC 430<br>Bacillus coagulans MTCC 492<br>Staphylococcus pyogenes MTCC 1928<br>Streptococcus anginosus MTCC 1929<br>Streptococcus oralis MTCC 2696<br>Streptococcus mutans MTCC 497<br>Micrococcus luteus MTCC 106                 | 10 ug/ml<br>5 ug/ml<br>5 ug/ml<br>8 ug/ml<br>2 ug/ml<br>6 ug/ml<br>8 ug/ml<br>10 ug/ml<br>2 ug/ml                                   |                                                         | [234] |
| Amicoumacin A           | B. subtilis B1779                              | Intracellular processes | Bacillus subtilis<br>Staphylococcus Aureus<br>Loktanella Hongkongensis                                                                                                                                                                                                                                               | 18.87 µM<br>18.87 µM<br>1.18 µM                                                                                                     | Marine sediment at depth of 1000 m in the Red Sea       | [235] |
|                         |                                                |                         | Bacillus subtilis 1779<br>Staphylococcus aureus UST950701-005<br>Methicillin-resistant Staphylococcus aureus ATCC43300                                                                                                                                                                                               | 20 µM<br>5.0 µM<br>4.0 µM                                                                                                           |                                                         | [236] |
|                         | B. pumilus BN-103                              | Intracellular processes | N/A                                                                                                                                                                                                                                                                                                                  | N/A                                                                                                                                 |                                                         | [237] |
|                         | B. subtilis BSXE-1601                          | Intracellular processes | Vibrio vulnificus S01P2<br>Vibrio harveyi SRTT9<br>Vibrio alginolyticus AR-1<br>Vibrio parahaemolyticus 20130629002S01<br>Pseudoalteromonas sp. LPE40<br>Shewanella marisflavi AP629<br>Streptococcus iniae iniae NUF849<br>Aeromonas hydrophila AP40301<br>Edwardsiella tarda HC01090721<br>Vibrio splendidus BSD11 | 1.25 ug/ml<br>1.25 ug/ml<br>1.25 ug/ml<br>1.25 ug/ml<br>1.25 ug/ml<br>1.25 ug/ml<br>10 ug/ml<br>>10 ug/ml<br>>10 ug/ml<br>>10 ug/ml |                                                         | [238] |
| Prumycin                | B. amyloliquefaciens SD-32                     | Intracellular processes | N/A                                                                                                                                                                                                                                                                                                                  | N/A                                                                                                                                 |                                                         | [109] |
|                         |                                                |                         | Staphylococcus aureus FDA 209P<br>Bacillus subtilis PCI 219                                                                                                                                                                                                                                                          | >100<br>>100                                                                                                                        |                                                         | [111] |

|              |                               |                         |                                                                                                                                                                                                                                                                                                                                                                                                                                                                                                                                                                                                                                                                                                                                                                                                                                                                    |                                                                                                                                                                                                                                                           |  |       |
|--------------|-------------------------------|-------------------------|--------------------------------------------------------------------------------------------------------------------------------------------------------------------------------------------------------------------------------------------------------------------------------------------------------------------------------------------------------------------------------------------------------------------------------------------------------------------------------------------------------------------------------------------------------------------------------------------------------------------------------------------------------------------------------------------------------------------------------------------------------------------------------------------------------------------------------------------------------------------|-----------------------------------------------------------------------------------------------------------------------------------------------------------------------------------------------------------------------------------------------------------|--|-------|
|              |                               |                         | Sarcina lutea PCI 1001<br>Salmonella typhimurium<br>Escherichia coli NIHJ<br>Pseudomonas aeruginosa P-3<br>Klebsiella pneumoniae<br>Shigella sonnei<br>Vibrio comma 904<br>Proteus vulgaris OX-19<br>Mycobacterium ATCC 607<br>Xanthomonas oryzae<br>Xanthomonas citri<br>Alternaria mali<br>Alternaria kikuchiana<br>Alternaria japonica<br>Sclerotinia cinerea<br>Sclerotinia sclerotiorum<br>Botrytis fabae<br>Botrytis cinerea<br>Botrytis cytoneriac<br>Cochliobolus miyabeanus<br>Collectotrichum lagenarium<br>Candida albicans<br>Saccharomyces cerevisiae<br>Cryptococcus neoformans<br>Hormodendrum pedrosoi<br>Fusarium moniliforme USDA 1004-1<br>Penicillium notatum<br>Trichophyton rubrum<br>Trichophyton mentagrophytes<br>Trichosporon beigellii<br>Glasosporium laeticolor<br>Glomerella cingulate<br>Ophiobolus miyabeanus<br>Aspergillus niger | 3.12<br>>100<br>100<br>>100<br>>100<br>100<br>12.5<br>>100<br>>100<br>50<br>>100<br>>100<br>>100<br>50<br>12.5<br>1.56<br>6.25<br>6.25<br>>100<br>50<br>50<br>>100<br>>100<br>>100<br>25<br>>100<br>>100<br>100<br>100<br>>100<br>50<br>100<br>25<br>>100 |  |       |
| Thiocillin   | B. cereus (strain ATCC 14579) | Intracellular processes | N/A                                                                                                                                                                                                                                                                                                                                                                                                                                                                                                                                                                                                                                                                                                                                                                                                                                                                | N/A                                                                                                                                                                                                                                                       |  | [239] |
|              |                               | Intracellular processes | Staphylococcus aureus ATCC 29213<br>Staphylococcus aureus 1974149<br>Staphylococcus aureus 1974148<br>Enterococcus faecalis 1674621<br>Enterococcus faecalis 1674614<br>Bacillus subtilis ATCC 6633<br>Streptococcus pyogenes 1744264                                                                                                                                                                                                                                                                                                                                                                                                                                                                                                                                                                                                                              | 2 ug/ml<br>2 ug/ml<br>2 ug/ml<br>0.5 ug/ml<br>0.5 ug/ml<br>4 ug/ml<br>0.5 ug/ml                                                                                                                                                                           |  | [240] |
| Hetiamacin E | B. subtilis PJS               | Intracellular processes | Staphylococcus epidermidis ATCC 12228 (MSSE)<br>Staphylococcus epidermidis 16-4 (MSSE)<br>Staphylococcus epidermidis 16-5 (MRSE)<br>Staphylococcus aureus ATCC 29213 (MSSA)<br>Staphylococcus aureus ATCC 33591 (MRSA)                                                                                                                                                                                                                                                                                                                                                                                                                                                                                                                                                                                                                                             | 2 µg/mL<br>4 µg/mL<br>4 µg/mL<br>8 µg/mL<br>16 µg/mL                                                                                                                                                                                                      |  | [114] |

|                |                                   |                         |                                                                                                                                                                                                                                                                                                                                                                                                      |                                                                                                                           |                                                           |       |
|----------------|-----------------------------------|-------------------------|------------------------------------------------------------------------------------------------------------------------------------------------------------------------------------------------------------------------------------------------------------------------------------------------------------------------------------------------------------------------------------------------------|---------------------------------------------------------------------------------------------------------------------------|-----------------------------------------------------------|-------|
|                |                                   |                         | Enterococcus faecium ATCC 700221 (VRE)<br>Escherichia coli ATCC 25922<br>Pseudomonas aeruginosa PAO1<br>Acinetobacter baumannii ATCC 19606<br>Shigella flexneri ATCC 12022                                                                                                                                                                                                                           | 64 µg/mL<br>64 µg/mL<br>64 µg/mL<br>64 µg/mL<br>64 µg/mL                                                                  |                                                           |       |
| Hetiamacin F   | B. subtilis PJS                   | Intracellular processes | Staphylococcus epidermidis ATCC 12228 (MSSE)<br>Staphylococcus epidermidis 16-4 (MSSE)<br>Staphylococcus epidermidis 16-5 (MRSE)<br>Staphylococcus aureus ATCC 29213 (MSSA)<br>Staphylococcus aureus ATCC 33591 (MRSA)<br>Enterococcus faecium ATCC 700221 (VRE)<br>Escherichia coli ATCC 25922<br>Pseudomonas aeruginosa PAO1<br>Acinetobacter baumannii ATCC 19606<br>Shigella flexneri ATCC 12022 | 32 µg/mL<br>32 µg/mL<br>32 µg/mL<br>>32 µg/mL<br>>32 µg/mL<br>>32 µg/mL<br>>32 µg/mL<br>32 µg/mL<br>32 µg/mL<br>>32 µg/mL |                                                           | [114] |
| Rhizoctin A    | B. cabrialesii TE3                | Intracellular processes | N/A                                                                                                                                                                                                                                                                                                                                                                                                  | N/A                                                                                                                       |                                                           | [241] |
|                | B. subtilis NBRC3134              | Intracellular processes | N/A                                                                                                                                                                                                                                                                                                                                                                                                  | N/A                                                                                                                       |                                                           | [242] |
|                | B. subtilis ATCC 6633             | Intracellular processes | Budding and filamentous fungi (Not available)<br>Caenorhabditis elegans                                                                                                                                                                                                                                                                                                                              | N/A                                                                                                                       |                                                           | [116] |
| Macrolactin N  | B. subtilis AT29                  | Intracellular processes | Staphylococcus aureus PDF<br><br>Escherichia coli<br><br>Staphylococcus aureus<br><br>Bacillus subtilis                                                                                                                                                                                                                                                                                              | IC50 = 7.5 µg/mL<br>MIC = 100 µg/mL<br>MIC50 = 100 µg/mL<br>MIC50 = 100 µg/mL                                             |                                                           | [117] |
| Azoxybacillin  | B. cereus NR2991                  | Intracellular processes | Aspergillus fumigatus<br><br>Trichophyton mentagrophytes<br><br>Candida albicans                                                                                                                                                                                                                                                                                                                     | IC80 = 0.71 ~ 1.3 µg/mL<br>IC80 = 0.03~ 0.04 µg/mL<br>Ic80: 4.2~ 5.8 µg/mL                                                |                                                           | [119] |
| Stigmatellin Y | B. subtilis BR4                   | Quorum sensing          | Pseudomonas aeruginosa (ATCC 27853)                                                                                                                                                                                                                                                                                                                                                                  | N/A                                                                                                                       |                                                           | [124] |
| Bacillaene     | N/A                               | Quorum sensing          | Escherichia coli K10<br>Escherichia coli SC10909<br>Escherichia coli SC10857<br>Escherichia coli SC10896<br>Escherichia coli BAS2006<br>Escherichia coli BAS847                                                                                                                                                                                                                                      | 37.0 µg/mL<br>0.09 µg/mL<br>5.0 µg/mL<br>0.6 µg/mL<br>0.6 µg/mL<br>0.5 µg/mL                                              |                                                           | [243] |
|                | B. velezensis LM2303              | Quorum sensing          | N/A                                                                                                                                                                                                                                                                                                                                                                                                  | N/A                                                                                                                       | dung of wild yak inhabited Qinghai-Tibet plateau, China   | [159] |
|                | B. subtilis XF-1 (CGMCC No. 2357) | Quorum sensing          | N/A                                                                                                                                                                                                                                                                                                                                                                                                  | N/A                                                                                                                       | rhizosphere soil of Chinese cabbage (Brassica pekinensis) | [43]  |

|               |                                                                    |                |                                                                                                                                                                                                                   |     |                                                         |       |
|---------------|--------------------------------------------------------------------|----------------|-------------------------------------------------------------------------------------------------------------------------------------------------------------------------------------------------------------------|-----|---------------------------------------------------------|-------|
|               | <i>B. amyloliquefaciens</i> C-1                                    | Quorum sensing | N/A                                                                                                                                                                                                               | N/A |                                                         | [244] |
|               | <i>B. amyloliquefaciens</i> DH-4                                   | Quorum sensing | N/A                                                                                                                                                                                                               | N/A |                                                         | [245] |
|               | <i>B. subtilis</i> 3610                                            | Quorum sensing | N/A                                                                                                                                                                                                               | N/A |                                                         | [246] |
|               | <i>B. velezensis</i> FZB42                                         | Quorum sensing | N/A                                                                                                                                                                                                               | N/A |                                                         | [158] |
|               | <i>B. amyloliquefaciens</i> ssp. <i>plantarum</i> F11              | Quorum sensing | N/A                                                                                                                                                                                                               | N/A |                                                         | [247] |
|               | <i>B. subtilis</i> strain SEM-2                                    | Quorum sensing | N/A                                                                                                                                                                                                               | N/A |                                                         | [232] |
|               | <i>B. subtilis</i> ATCC 55422                                      | Quorum sensing | N/A                                                                                                                                                                                                               | N/A |                                                         | [248] |
|               | <i>Bacillus amyloliquefaciens</i> subsp. <i>plantarum</i> B9601-Y2 | Quorum sensing | N/A                                                                                                                                                                                                               | N/A | wheat rhizosphere                                       | [156] |
|               | <i>B. amyloliquefaciens</i> LL3                                    | Quorum sensing | N/A                                                                                                                                                                                                               | N/A |                                                         | [189] |
| Bacillibactin | <i>B. amyloliquefaciens</i> MBI600                                 |                | <i>Pseudomonas syringae</i> pv. <i>Tomato</i><br><i>V. dahliae</i> 70wt-r1<br><i>R. solani</i> AG2-1<br><i>A. flavus</i> CBS128202<br><i>Fusarium oxysporum</i> f. sp. <i>radices</i> – <i>lycopersici</i> – FRL1 | N/A |                                                         | [249] |
|               | <i>B. velezensis</i> LM2303                                        | Quorum sensing | N/A                                                                                                                                                                                                               | N/A | dung of wild yak inhabited Qinghai-Tibet plateau, China | [159] |
|               | <i>B. subtilis</i> S499                                            |                | N/A                                                                                                                                                                                                               | N/A |                                                         | [157] |
|               | <i>B. subtilis</i> BSD-2                                           | Quorum sensing | N/A                                                                                                                                                                                                               | N/A |                                                         | [231] |
|               | <i>B. siamensis</i> JFL15                                          | Quorum sensing | N/A                                                                                                                                                                                                               | N/A | isolated from the gastrointestinal tract of hair-tail   | [207] |
|               | <i>B. subtilis</i> strain SEM-2                                    | Quorum sensing | N/A                                                                                                                                                                                                               | N/A | silkworm excrement composting                           | [231] |
| Itoic Acid    | <i>B. subtilis</i> B-1471                                          | Quorum sensing | N/A                                                                                                                                                                                                               | N/A |                                                         | [250] |
|               |                                                                    | Quorum sensing | <i>Saccharomyces cerevisiae</i>                                                                                                                                                                                   | N/A |                                                         | [251] |
| Schizokinen   | <i>B. megaterium</i> ATCC 19213                                    | Quorum sensing | N/A                                                                                                                                                                                                               | N/A |                                                         | [128] |
|               |                                                                    | Quorum sensing | <i>Saccharomyces cerevisiae</i>                                                                                                                                                                                   | N/A |                                                         | [251] |

ZoI = Zone of inhibition.
